# Supplementary material
Source: HighWire-hosted journal article supplement (https://www.annfammed.org/highwire/filestream/7985/field_highwire_adjunct_files/0/Meyers_Suppl_Tables-revised.pdf)
Supplement: Meyers_Suppl_Tables-revised.pdf [file Meyers_Suppl_Tables-revised.pdf]

Online Supplementary Material

Meyers DS, Mishori R, McCann J, Delgado J, O'Malley A, Fryer E. Primary care physicians? Perceptions of the effect of insurance status on clinical decision making. *Ann Fam Med*. 2006;4:399-402.

<http://www.annfammed.org/cgi/content/full/4/5/399/DC1>

| <b>Supplemental Table 1. Patient Characteristics</b> |                                |                |
|------------------------------------------------------|--------------------------------|----------------|
| <b>Characteristic</b>                                | <b>Frequency<br/>(n = 409)</b> | <b>Percent</b> |
| Sex                                                  |                                |                |
| Female                                               | 239                            | 58.4           |
| Male                                                 | 162                            | 39.6           |
| Not listed                                           | 8                              | 2.0            |
| Race                                                 |                                |                |
| Asian                                                | 21                             | 5.1            |
| Black                                                | 179                            | 43.8           |
| White                                                | 180                            | 44.0           |
| Unknown                                              | 4                              | 1.7            |
| Not listed                                           | 25                             | 6.1            |
| Ethnicity                                            |                                |                |
| Hispanic                                             | 60                             | 14.7           |
| Non-Hispanic                                         | 326                            | 79.7           |
| Not listed                                           | 23                             | 5.6            |
| Age, years                                           |                                |                |
| 0-10                                                 | 77                             | 18.8           |
| 11-20                                                | 47                             | 11.5           |
| 21-30                                                | 66                             | 16.1           |
| 31-40                                                | 50                             | 12.2           |
| 41-50                                                | 53                             | 13.0           |
| 51-60                                                | 64                             | 15.6           |
| > 60                                                 | 52                             | 12.7           |
| Insurance                                            |                                |                |
| Uninsured                                            | 23                             | 5.6            |
| Private                                              | 200                            | 48.9           |
| Medicare                                             | 13                             | 3.2            |
| Medicare + other                                     | 14                             | 3.4            |
| Medicaid                                             | 62                             | 15.2           |
| Other public                                         | 91                             | 22.2           |
| Not reported                                         | 6                              | 1.5            |

| Supplemental Table 2, Revised. Association Between Independent Variables and the Mean Degree to Which Physicians Reported Considering Insurance When Making Clinical Decisions During a Visit               |        |        |     |                |         |
|-------------------------------------------------------------------------------------------------------------------------------------------------------------------------------------------------------------|--------|--------|-----|----------------|---------|
| Variable                                                                                                                                                                                                    | Mean * | SD     | n   | Test Statistic | P Value |
| Sex                                                                                                                                                                                                         |        |        |     |                |         |
| Male                                                                                                                                                                                                        | 1.574  | 2.4349 | 162 | t = 1.039      | .299    |
| Female                                                                                                                                                                                                      | 1.838  | 2.5359 | 237 |                |         |
| Ethnicity                                                                                                                                                                                                   |        |        |     |                |         |
| Hispanic                                                                                                                                                                                                    | 2.838  | 3.1237 | 60  | t = 3.151      | .002    |
| Non-Hispanic                                                                                                                                                                                                | 1.505  | 2.3146 | 324 |                |         |
| Race                                                                                                                                                                                                        |        |        |     |                |         |
| Black                                                                                                                                                                                                       | 1.908  | 2.6072 | 177 | t = 2.132      | .034    |
| White                                                                                                                                                                                                       | 1.374  | 2.0975 | 180 |                |         |
| Age, years                                                                                                                                                                                                  |        |        |     |                |         |
| Birth to 10                                                                                                                                                                                                 | 0.542  | 1.6345 | 77  | F = 4.800      | .000    |
| 11-20                                                                                                                                                                                                       | 1.226  | 2.0463 | 46  |                |         |
| 21-30                                                                                                                                                                                                       | 1.880  | 2.6854 | 66  |                |         |
| 31-40                                                                                                                                                                                                       | 1.953  | 2.9529 | 49  |                |         |
| 41-50                                                                                                                                                                                                       | 2.194  | 2.8495 | 52  |                |         |
| 51-60                                                                                                                                                                                                       | 2.322  | 2.2764 | 53  |                |         |
| > 60                                                                                                                                                                                                        | 2.158  | 2.4219 | 64  |                |         |
| Insurance type                                                                                                                                                                                              |        |        |     |                |         |
| Public                                                                                                                                                                                                      | 2.148  | 2.6081 | 174 | F = 43.961     | .000    |
| Private                                                                                                                                                                                                     | .974   | 1.7413 | 198 |                |         |
| Uninsured                                                                                                                                                                                                   | 5.308  | 3.2292 | 24  |                |         |
| Office type                                                                                                                                                                                                 |        |        |     |                |         |
| Hospital/university affiliated                                                                                                                                                                              | .963   | 1.7965 | 241 | F = 67.947     | .000    |
| Private nonprofit                                                                                                                                                                                           | 2.945  | 2.9658 | 151 |                |         |
| Note: Revised October 23, 2006.                                                                                                                                                                             |        |        |     |                |         |
| * Variable captured using a visual analog scale. Clinicians placed a mark on a 9.7-cm line to indicate "to what degree, if any, did insurance enter your thought process while making a clinical decision?" |        |        |     |                |         |

**Supplemental Table 3. Multivariate Analysis of Predictors of the Degree to Which Physicians Reported Considering Insurance When Making Clinical Decisions During a Visit**

| Variable       | Sum of Squares | F Value | P Value |
|----------------|----------------|---------|---------|
| Sex            | 0.114          | 0.025   | .875    |
| Ethnicity      | 2.763          | 0.600   | .439    |
| Race           | 3.185          | 0.691   | .406    |
| Age            | 38.819         | 8.426   | .004    |
| Insurance type | 156.057        | 16.937  | < .001  |
| Office type    | 70.890         | 15.388  | < .001  |

\* Variable captured using a visual analog scale. Clinicians placed a mark on a 9.7-cm line to indicate "to what degree, if any, did insurance enter your thought process while making a clinical decision?"
